RESEARCH ARTICLE

# Association between Anthropometric Measures and Indicators for Hypertension Control among Kazakh-Chinese Hypertension Patients in Xinjiang, China: Results from a Cross-sectional Study

Qinghua Zhang<sup>1,2</sup>, Tanmay Mahapatra<sup>3</sup>, Feifei Huang<sup>4</sup>, Weiming Tang<sup>5</sup>, Yufang Guo<sup>1</sup>, Songyuan Tang<sup>5</sup>, Yang Lei<sup>6</sup>, Lei Feng<sup>7</sup>, Anni Wang<sup>1</sup>, Liuyi Zhang<sup>1</sup>, Jingping Zhang<sup>1\*</sup>

**1** Xiang Ya Nursing School, Central South University, Changsha, Hunan, China, **2** School of Nursing, Xinjiang Medical University, Urumqi, Xinjiang, China, **3** University of California Los Angeles, Los Angeles, United States of America, **4** School of Nursing, Fujian Medical University, Fuzhou, Fujian, China, **5** University of North Carolina Project-China, Guangzhou, China, **6** The Nethersole School of Nursing, The Chinese University of Hong Kong, Hong Kong, China, **7** Medical Department, The people's hospital of Xinjiang Uyghur autonomous region, Urumqi, Xinjiang, China

\* [jpzhang1965@163.com](mailto:jpzhang1965@163.com)

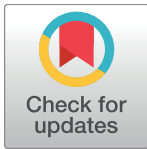

**OPEN ACCESS**

**Citation:** Zhang Q, Mahapatra T, Huang F, Tang W, Guo Y, Tang S, et al. (2017) Association between Anthropometric Measures and Indicators for Hypertension Control among Kazakh-Chinese Hypertension Patients in Xinjiang, China: Results from a Cross-sectional Study. PLoS ONE 12(1): e0170959. doi:10.1371/journal.pone.0170959

**Editor:** Tatsuo Shimomura, The University of Tokyo, JAPAN

**Received:** September 12, 2016

**Accepted:** January 14, 2017

**Published:** January 27, 2017

**Copyright:** © 2017 Zhang et al. This is an open access article distributed under the terms of the [Creative Commons Attribution License](https://creativecommons.org/licenses/by/4.0/), which permits unrestricted use, distribution, and reproduction in any medium, provided the original author and source are credited.

**Data Availability Statement:** All relevant data are within the paper and its Supporting Information.

**Funding:** This study was supported by the Fundamental Research Funds for the Central South University (number 2013zzts079) and the Research Funds of Humanities & Social Science from the Ministry of Education of the People's Republic of China (number 15YJCZH223) to Qinghua Zhang. The funders had role in study design, data collection, analysis, preparation of the

## Abstract

### Background

Among Kazakh-Chinese population in Xinjiang province of China, prevalence of obesity and hypertension were 40.1% and 50.3% respectively, the highest across all ethnic groups residing in this pastureland. Despite this, there remained a dearth of information regarding the association between the anthropometric measures [body mass index (BMI), waist circumference (WC), waist-hip ratio (WHR), Waist-to-height ratio (WHtR) etc.] and indicators for hypertension control [achieved levels of systolic and diastolic blood pressures (SBP and DBP), pulse pressure index (PPI), ankle-brachial index (ABI) etc.] among them.

### Method

A cross-sectional study was conducted in Xinjiang to determine the distribution and inter-relationships of the anthropometric measures and indicators for achieved BP control as well as their predictors among hypertension patients of Kazakh-Chinese ethnicity. Out of 550 randomly selected patients, 516 completed the interview, anthropometry and BP assessments.

### Results

In the sample population, average SBP, DBP and PP were 156.26±24.40mmHg, 87.55±14.73mmHg and 68.71±19.39mmHg respectively. Bivariate analysis identified age, gender, education, duration of hypertension, WC and BMI being factors influencing the achieved levels of BP. Adjusted multiple linear regression models elicited positive

manuscript and decision regarding submission for publication of the article.

**Competing Interests:** The authors have declared that no competing interests exist.

associations of age ( $\beta^a = 0.152$ ,  $p = 0.001$ ) and duration of hypertension ( $\beta^a = 0.132$ ,  $p = 0.003$ ) with achieved level of SBP as well as BMI ( $\beta^a = 0.135$ ,  $p = 0.002$ ) with DBP. Age ( $\beta^a = 0.207$ ,  $p < 0.001$ ) and WHtR ( $\beta^a = 0.304$ ,  $p = 0.005$ ) were positively and WC ( $\beta^a = -0.406$ ,  $p < 0.001$ ) was negatively associated with PPI. Increasing age ( $\beta^a = -0.125$ ,  $p = 0.005$ ), female gender ( $\beta^a = -0.122$ ,  $p = 0.005$ ) and 5years' duration of hypertension ( $\beta^a = -0.091$ ,  $p < 0.039$ ) were negatively associated with ABI. After adjustment for socio-demographic variables, hypertensive patients with (reference = without) abdominal obesity had 93% ( $p = 0.013$ ) higher odds of missing the target BP control.

## Conclusion

Anthropometric measures and indicators for blood pressure control among Kazakh-Chinese patients were far beyond normal. Several anthropometric measures appeared useful for monitoring BP. Using them, regular screening and consequent targeted intervention were required urgently to control hypertension among Kazakh-Chinese.

## Introduction

Hypertension is regarded as one of the major contributing factor for the global burden of diseases[1]. Worldwide, two-third deaths from stroke and half of the deaths from coronary artery diseases are also attributed to hypertension[2]. In China, the prevalence of hypertension has increased from 19.8% in 2004 to 30.6% in 2010, and this alarming upsurge has been observed across age, gender and urban/rural areas[3]. In Xinjiang province, the scenario is even worse as evident from the observed hypertension prevalence of 40.1% (men: 42.1% vs women: 38.4%)[4]. In this province, persons belonging to Kazakh ethnicity have the highest prevalence of hypertension (50.3%), followed by Han (38.9%) and Uyгур (32.9%) respectively[4]. Thus Hypertension has become one of the major public health concerns among Kazakh-Chinese people.

Pulse pressure index (PPI) is a relatively novel estimate of arterial stiffness defined as “pulse pressure/systolic pressure”[5]. The value of PPI ranges between 0 and 1. There is substantial evidence that PPI correlates negatively with vascular compliance[5] and can be considered an independent measure of cardiovascular mortality[6]. Prior research already demonstrated that hypertensive patients with higher PPI had a more reduced renal function[7]. Furthermore, PPI was also found to be useful in early screening of carotid atherosclerosis among these patients[8]. Despite this well-understood importance of PPI as a prognostic/screening indicator, in China, there remained a dearth of information regarding the burden of PPI among patients having hypertension, especially in Kazakh-Chinese community.

Ankle-brachial index (ABI) is another parameter having a strong correlation with cardiovascular adversities[9]. Since 2007, the guidelines [for the management of arterial hypertension](#) issued by the European Society of Cardiology (ESC) and European Society of Hypertension (ESH) did include ABI as a parameter for early detection of peripheral artery diseases (PAD) [10]. As per the reported evidences,  $ABI < 0.9$  also appeared to be an independent predictor of cardiovascular mortality[11].

Obesity has long been established as an important and independent risk factor for the development and complication of hypertension[12–14]. In China, the prevalence of obesity alarmingly increased from 3.75% in 1991 to 11.3% in 2011[15]. In Xinjiang, in 2010, this prevalence was 26.9%, while just like hypertension, Kazakhs had the highest burden (40.1%),

followed by the Uyghurs (28.9%) and the Han (18.4%)[16]. Body Mass Index (BMI), Waist Circumference (WC), Waist-to-height ratio (WHtR) and Waist-hip ratio (WHR) are simple and valid anthropometric measures for the assessment of obesity and risk of hypertension[17, 18] However, the strengths of association of these four indexes with hypertension, PPI and ABI varied across population and those among Kazakh-Chinese hypertensives, were still unknown.

The aforementioned dearth of information regarding the distribution and determinants of indicators for blood pressure (BP) control and identification of appropriate anthropometric measures to monitor them, called for a detailed investigation involving the hypertensive patients of Kazakh-Chinese ethnic group.

## Methods

### Design

Between June 2013 and February 2014, a cross-sectional study was conducted to determine the distribution of the anthropometric measures (BMI, WC, WHR, WHtR etc.), indicators (SBP, DBP, PPI, ABI etc.) for achieved levels of BP control, their inter-relationship and predictors among Kazakh-Chinese hypertensive patients in Xinjiang pastureland in Western China. Using a stratified cluster random sampling strategy, hypertensive patients belonging to this minority group were recruited for the current study if they met all the following inclusion criteria: (a) systolic BP (SBP)  $\geq 140$ mmHg and/or diastolic BP (DBP)  $\geq 90$ mmHg or taking anti-hypertensive medication[19], (b) age  $\geq 18$  years, (c) not suffering from any cognitive dysfunctions, severe enough to prevent appropriate communication and (d) provided voluntary informed consent for participating in the study. The cities/counties in Xinjiang province having congregation of Kazakh-Chinese communities were enlisted first and one of them was selected from the list randomly. Then hypertensive patients of Kazakh-Chinese ethnicity, aged  $\geq 18$  years were identified based on individual health assessment records and periodic follow-up records of the residents, enlisted and then randomly recruited from that list according to their age and gender distribution.

### Sample size

Information on SBP level ( $158 \pm 22$  mmHg) among Kazakh-Chinese hypertensive patients measured in an epidemiological investigation in Xinjiang during 2010[20], was used as the parameter value for the sample size calculation. Using the formula  $N = (1.96 * S / \delta)^2$ [21], where  $S$  = standard deviation and  $\delta$  = allowable error, assuming  $\alpha = 0.05$ , the desired sample size ( $N$ ) was determined to be 465 patients  $[(1.96 * 22 / 2)^2]$ . Further assuming 20% non-response 550 eligible subjects were required to be recruited for the study.

### Recruitment

Investigators and community public health physicians conducted the face-to-face interview and measurements (BP and anthropometry) respectively at home or health service centers.

### Ethics statement

Prior to the interview and examinations, written informed consent was obtained from each participant after explaining all details pertaining to the study. The content and procedure of the study were reviewed and approved (Reference No: 20130216–134) by the Ethics Committee of the First Affiliated Hospital of Xinjiang Medical University, Xinjiang, China.

## Data collection

Using a pre-tested, structured, questionnaire, face to face interviews with eligible participants were conducted to collect information on the socio-demographic and behavioral aspects followed by the physical assessment and anthropometry.

## BP and anthropometric measurements

After allowing the subject to rest for 5–10 minutes, two arm-type electronic sphygmomanometers (UA-621, A&D Medical, Japan)[22] were used to measure the right brachial BP at the level of the heart and the corresponding right ankle BP at the medial point between the external ankle and the malleolus in supine position.

Standardized techniques and calibrated devices were used for all anthropometric measurements. For each of these measurements, arithmetic average of the observed values from two repeated observations were used. Height (in cm) was measured and rounded to the nearest 0.1 cm, using a stadiometer, with participants standing upright, without shoes. Body weight (kg) was measured and similarly rounded to the nearest 0.1 kg using an automatic electronic scale, with participants wearing light clothing and not wearing footwear. WC (in cm) was measured to the nearest 0.1cm, by an anthropometric tape, at the midpoint between the last palpable rib and iliac crest while the participants stood with feet 25–30 cm apart.

## Definitions and criteria

According to the JNC-8 the 2014 guideline, the targets for the general population aged  $\geq 60$  years were defined as: “SBP < 150mmHg and DBP < 90mmHg”[23]. In the general population aged < 60 years, SBP < 140mmHg and DBP < 90mmHg were targeted. In the population aged  $\geq 18$  years with diabetes or CKD, targets were set at: “SBP < 140mmHg and goal DBP < 90mmHg [23]” ABI was calculated as the systolic BP measured at ankle divided by that in brachial. ABI < 0.9 an identified predictor for cardiac complications, was defined as the diagnostic criteria for the peripheral arterial disease [[24]]. Based on BMI [weight in kg/(height in meter)<sup>2</sup>] participants were categorized into three groups: obese (BMI  $\geq 30$ ), overweight ( $25 \leq$  BMI < 30) and normal/ underweight (BMI < 25). Abdominal obesity was determined based on both WC as well as Waist-to-hip ratio (WHR = WC in cm/hip circumference in cm). Men with WC  $\geq 102$ cm and women with WC  $\geq 88$ cm were considered as having abdominal obesity while abdominal overweight meant  $94\text{cm} \leq \text{WC} < 102\text{cm}$  in men and  $80\text{cm} \leq \text{WC} < 88\text{cm}$  in women. WC < 94cm in men and WC < 80cm in women were considered normal[25]. Again WHR  $\geq 0.90$  in man and WHR  $\geq 0.85$  in women were classified as abdominal obesity[26, 27]. Additionally, Waist-to-height ratio (WHtR = WC in cm/height in cm)  $\geq 0.5$  was defined as centralized obesity[28].

## Data analysis

All analyses were conducted using SPSS version 20.0 (S1 Dataset). The results were considered statistically significant when p value was < 0.05. Distributions of the participant characteristics and anthropometric findings were determined by descriptive analyses [mean  $\pm$  standard deviation (SD) for continuous and subgroup-specific percentages for categorical variables]. T-test of Independent sample and One-way ANOVA were used to compare the continuous variables (SBP, DBP, PPI, ABI, BMI, WC, WHR and WHtR). Associations between categorical variables were tested using Chi-square test. Bivariate analysis was used to explore the association between BP and anthropometric findings. Multiple stepwise regression analysis was used to determine the risk factors for SBP, DBP, PPI and ABI among participants. To understand the

role of the potential determinants in achieving targeted level of control over BP, binary logistic regression analysis was performed adjusting for age, gender and medical treatment.

## Results

### Sample characteristics

Among 550 randomly selected eligible subjects, 516 (46.3% males and 53.7% females) completed the interview along with the clinical examination and anthropometric measurements. The overall response rate was 93.82%. The mean age was  $58.14 \pm 12.05$  years. Mean BMI was found to be  $27.77 \pm 4.80$  and mean WC was  $97.56 \pm 13.07$ . Only 34.5% were receiving regular medical treatment for hypertension at the time of the survey. BP of 72.7% patients never reached the target level. Among participating patients, an average SBP was  $156.26 \pm 24.40$  mmHg, DBP was  $87.55 \pm 14.73$  mmHg and the PP was  $68.71 \pm 19.39$  mmHg. (Table 1)

In addition, 15 individuals suffering from diabetes, 6 individuals had chronic kidney disease, 64 had coronary heart disease, 7 suffered from cerebral stroke, 3 individuals had both diabetes and coronary heart disease while 2 individuals had cerebral stroke combined with coronary heart disease.

### Distribution of BP-related measures across socio-demographic strata

Older age groups had higher SBP than <50 years aged ( $156.60 \pm 26.67$  for 50–60 years,  $156.77 \pm 22.42$  for 60–70 years and  $162.38 \pm 24.12$  for >70 years vs.  $150.59 \pm 23.19$  mmHg for <50 years,  $p < 0.05$ ). Again 60–70 years old patients had lower DBP than 50–60 years' group ( $85.41 \pm 13.29$  vs.  $90.50 \pm 17.26$  mmHg,  $p < 0.01$ ). PPI was increasing, but ABI was decreasing with advancing age. SBP and PPI of females were higher than males (SBP:  $158.30 \pm 25.29$  vs.  $153.88 \pm 23.14$  mmHg, and PPI:  $0.44 \pm 0.08$  vs.  $0.43 \pm 0.08$  mmHg,  $p < 0.05$ ). BP control was marginally better among men than women (28.0% vs. 26.7%). Patients who did not attend high school had higher SBP than those who had high school or higher level of education ( $157.65 \pm 24.24$  vs.  $153.06 \pm 24.53$  mmHg,  $p < 0.05$ ). SBP and PPI of full-time employed subjects were higher than the part-time workers (SBP:  $156.08 \pm 24.76$  vs.  $148.55 \pm 23.08$  mmHg, and PPI:  $0.43 \pm 0.08$  vs.  $0.40 \pm 0.08$  mmHg,  $p < 0.05$ ). Those who were having hypertension for  $\geq 5$  years had higher SBP and ABI than those suffering from <5 years (SBP:  $161.55 \pm 24.97$  vs.  $153.32 \pm 23.60$  mmHg, and ABI:  $1.15 \pm 0.14$  vs.  $1.12 \pm 0.13$ ,  $p < 0.01$ ). SBP, DBP, PPI, and ABI did not vary significantly across the categories of complication and treatment of hypertension. Also, there was no statistical significance for the variation in the proportion of patients for whom targeted control of BP across the strata of received treatment ( $p = 0.756$ ). (Table 2)

### Distribution of BP-related measures across categories of anthropometric findings

Compared to those with  $BMI < 25 \text{ kg/m}^2$ , obese subjects had higher DBP and lower PPI ( $p < 0.01$ ). SBP and DBP were increasing with increase in WC, WHR and WHtR. Compared those with normal WC, patients having abdominal obesity (based on WC) had higher SBP and DBP (SBP:  $157.72 \pm 24.04$ , vs.  $152.44 \pm 23.98$ ,  $p < 0.05$  and DBP:  $88.93 \pm 13.96$  vs.  $84.69 \pm 15.99$  mmHg;  $p < 0.01$ ). (Table 3)

### Factors influencing BP-related measures

After adjusting for treatment, socio-demographic and anthropometric correlates of SBP, DBP, PPI, and ABI were determined through multiple linear regression modelling. Age (adjusted coefficient:  $\beta^a = 0.152$ ,  $p = 0.001$ ) and duration of hypertension ( $\beta^b = 0.132$ ,  $p = 0.003$ ) had

**Table 1. Characteristics of the Kazakh-Chinese hypertension patients (N = 516) residing in the pasture area of Xinjiang, China, 2014.**

| Numerical variables                   | Mean±SD       |
|---------------------------------------|---------------|
| <b>Demographic characteristics</b>    |               |
| Age(years)                            | 58.14±12.05   |
| <b>Anthropometric characteristics</b> |               |
| Blood pressure (BP, mmHg)             |               |
| SBP                                   | 156.26±24.40  |
| DBP                                   | 87.55±14.73   |
| PP                                    | 68.71±19.39   |
| ABI                                   | 1.14±0.14     |
| BMI                                   | 27.77±4.80    |
| WC                                    | 97.56±13.07   |
| WHR                                   | 0.95±0.09     |
| WHtR                                  | 0.60±0.09     |
| Categorical variables                 | Frequency (%) |
| <b>Demographic characteristics</b>    |               |
| Gender                                |               |
| Male                                  | 239(46.3)     |
| Female                                | 277(53.7)     |
| Education level                       |               |
| Less than high school                 | 359(69.6)     |
| High school or higher                 | 157(30.4)     |
| Marital status                        |               |
| Married                               | 431(83.5)     |
| Unmarried/ Divorce/Widowed            | 85(16.5)      |
| Occupational status                   |               |
| Unemployed                            | 183(35.5)     |
| Part-time employment                  | 83(16.1)      |
| Full-time employee                    | 250(48.4)     |
| Family annual income                  |               |
| <10,000RMB                            | 390(75.6)     |
| 10,000~30,000RMB                      | 103(20.0)     |
| ≥30,000RMB                            | 23(4.5)       |
| Family history of hypertension(years) |               |
| No                                    | 215(41.7)     |
| Yes                                   | 301(58.3)     |
| Complication of hypertension          |               |
| No                                    | 422(81.8)     |
| Yes                                   | 94(18.2)      |
| Years with hypertension (years)       |               |
| <5                                    | 332(64.3)     |
| ≥5                                    | 184 (35.7)    |
| Medication treatment                  |               |
| No                                    | 338(65.5)     |
| Yes                                   | 178(34.5)     |

doi:10.1371/journal.pone.0170959.t001

positive associations with SBP. Patients with higher BMI had more DBP ( $\beta^a = 0.135$ ,  $p = 0.002$ ). PPI was associated negatively with WC ( $\beta^a = -0.406$ ,  $p < 0.001$ ) and positively with age ( $\beta^a = 0.207$ ,  $p < 0.001$ ) and WHtR ( $\beta^a = 0.304$ ,  $p = 0.005$ ). Age ( $\beta^a = -0.125$ ,  $p = 0.005$ ),

**Table 2. Distribution of blood pressure related measures across the socio-demographic strata among Kazakh-Chinese hypertension patients (N = 516) residing in the pasture area of Xinjiang, China, 2014.**

| Variables                    | n   | SBP (mmHg)     | DBP (mmHg)                | PPI                       | ABI                       |
|------------------------------|-----|----------------|---------------------------|---------------------------|---------------------------|
| Age(years)                   |     |                |                           |                           |                           |
| <50                          | 130 | 150.59±23.19   | 87.46±13.68               | 0.41±0.08                 | 1.17±0.13                 |
| 50~60                        | 139 | 156.60±26.67*  | 90.50±17.26               | 0.42±0.08                 | 1.14±0.13                 |
| 60~70                        | 147 | 156.77±22.42*  | 85.41±13.29 <sup>△△</sup> | 0.45±0.08** <sup>△△</sup> | 1.13±0.14*                |
| ≥70                          | 100 | 162.38±24.12** | 86.71±13.74 <sup>△</sup>  | 0.46±0.08** <sup>△△</sup> | 1.10±0.12** <sup>△†</sup> |
| Gender                       |     |                |                           |                           |                           |
| Male                         | 239 | 153.88±23.14   | 87.49±14.88               | 0.43±0.08                 | 1.16±0.14                 |
| Female                       | 277 | 158.30±25.29*  | 87.60±14.62               | 0.44±0.08*                | 1.12±0.13**               |
| Education                    |     |                |                           |                           |                           |
| Less than high school        | 359 | 157.65±24.24   | 87.80±14.62               | 0.44±0.08                 | 1.14±0.13                 |
| High school or higher        | 157 | 153.06±24.53*  | 86.98±14.99               | 0.43±0.07                 | 1.14±0.15                 |
| Complication of hypertension |     |                |                           |                           |                           |
| No                           | 299 | 155.61±24.42   | 87.41±14.90               | 0.43±0.08                 | 1.14±0.14                 |
| Yes                          | 85  | 159.14±24.22   | 88.17±13.98               | 0.44±0.07                 | 1.12±0.13                 |
| Years of hypertension(years) |     |                |                           |                           |                           |
| <5                           | 332 | 153.32±23.60   | 88.84±14.11               | 0.43±0.08                 | 1.15±0.14                 |
| ≥5                           | 184 | 161.55±24.97** | 88.83±15.74               | 0.45±0.08*                | 1.12±0.13**               |
| Medication treatment         |     |                |                           |                           |                           |
| No                           | 338 | 155.07±24.85   | 86.64±15.67               | 0.44±0.08                 | 1.14±0.14                 |
| Yes                          | 178 | 158.51±23.41   | 89.26±12.62               | 0.43±0.07                 | 1.14±0.13                 |

\*P < 0.05.

\*\*P < 0.01 in comparison with age <50, male, less than high school, years of hypertension <5year.

<sup>△</sup>P < 0.05.

<sup>△△</sup>P < 0.01 in comparison with age 50~60.

<sup>†</sup> P < 0.05 in comparison with age 60~70.

doi:10.1371/journal.pone.0170959.t002

gender ( $\beta^a = -0.122, p = 0.005$ ) and duration of hypertension ( $\beta^a = -0.091, p = 0.039$ ) were negatively associated significantly with ABI. (Table 4)

### Anthropometric findings and achieved level of BP through control measures

After adjustment for age, gender, duration and treatment of hypertension, abdominal obesity (OR: 1.932; 95%CI: 1.149~3.249; p = 0.013) was found to be associated positively with achieved BP levels through control measures (Table 5).

### Discussion and Conclusion

Kazakh-Chinese community is the second largest ethnic minority group in Xinjiang. They live in the mountains, eat cheese and meat more with less intake of vegetables and fruits. Such unhealthy food habit was likely to increase the risk of obesity, hyperlipidemia and hypertension in this population. Thus it was not surprising that among Kazakh-Chinese residents of Xinjiang province, based on prior findings, 50.3% were suffering from hypertension[4] and 40.1% from obesity[16], highest among any other ethnic groups in this province.

In the current study, also, the observed burden of general (29.46%) and abdominal obesity (61.82%) were very high among Kazakhs. Corroborating with several prior studies,

**Table 3. Distribution of the BP-related measures across the strata of anthropometric findings among Kazakh-Chinese hypertension patients (N = 516) residing in the pasture area of Xinjiang, China, 2014.**

| Variables         | n   | SBP (mmHg)     | DBP (mmHg)                 | PPI                      | ABI       |
|-------------------|-----|----------------|----------------------------|--------------------------|-----------|
| <b>BMI</b>        |     |                |                            |                          |           |
| BMI<25            | 151 | 155.72±25.25   | 86.75±16.70                | 0.44±0.07                | 1.12±0.15 |
| 25≤BMI<30         | 213 | 155.39±24.11   | 85.15±11.93                | 0.45±0.08                | 1.15±0.14 |
| BMI≥30            | 152 | 158.00±24.00   | 91.70±15.38** <sup>△</sup> | 0.41±0.09** <sup>△</sup> | 1.14±0.12 |
| <b>WC</b>         |     |                |                            |                          |           |
| <94cm(men)        | 112 | 152.44±23.98   | 84.69±15.99                | 0.44±0.08                | 1.14±0.16 |
| <80cm(women)      |     |                |                            |                          |           |
| 94≤WC<102cm(men)  | 85  | 155.79±25.95   | 86.13±15.29                | 0.44±0.08                | 1.15±0.12 |
| 80≤WC<88cm(women) |     |                |                            |                          |           |
| ≥102cm(men)       | 319 | 157.72±24.04** | 88.93±13.96**              | 0.43±0.08                | 1.14±0.13 |
| ≥88cm(women)      |     |                |                            |                          |           |
| <b>WHR</b>        |     |                |                            |                          |           |
| <0.90(men)        | 83  | 154.10±25.21   | 86.98±18.62                | 0.43±0.07                | 1.15±0.16 |
| <0.85(women)      |     |                |                            |                          |           |
| ≥0.90(men)        | 433 | 156.67±24.24   | 87.66±13.88                | 0.43±0.08                | 1.14±0.13 |
| ≥0.85(women)      |     |                |                            |                          |           |
| <b>WHtR</b>       |     |                |                            |                          |           |
| <0.5              | 62  | 152.15±23.73   | 84.42±13.87                | 0.44±0.08                | 1.14±0.16 |
| ≥0.5              | 454 | 156.82±24.46   | 87.98±14.80                | 0.43±0.08                | 1.14±0.13 |

\*P < 0.05.

\*\*P < 0.01 in comparison with BMI <25; WC<94cm in men and 80cm in women.

<sup>△</sup>P < 0.01 in comparison with 25≤BMI<30.

doi:10.1371/journal.pone.0170959.t003

anthropometric measures like BMI, WC, WHR and WHtR were positively associated with achieved BP level. Generally, the predictive roles of anthropometric indicators in BP control vary across population. Regzedmaa et al[29] noted that as opposed to WHR, BMI was more

**Table 4. Significant correlates of SBP, DBP, PPI and ABI among Kazakh-Chinese hypertension patients (N = 516) residing in the pasture area of Xinjiang, China, 2014.**

| Risk factors                  | B      | Std. Error | B <sup>a</sup> | t      | P value |
|-------------------------------|--------|------------|----------------|--------|---------|
| <b>SBP</b>                    |        |            |                |        |         |
| Age                           | 0.307  | 0.089      | 0.152          | 3.455  | 0.001   |
| Years of hypertension (years) | 6.718  | 2.235      | 0.132          | 3.006  | 0.003   |
| <b>DBP</b>                    |        |            |                |        |         |
| BMI                           | 0.415  | 0.134      | 0.135          | 3.095  | 0.002   |
| <b>PPI</b>                    |        |            |                |        |         |
| Age                           | 0.001  | 0.000      | 0.207          | 4.657  | <0.001  |
| WC                            | -0.002 | 0.001      | -0.406         | -3.805 | <0.001  |
| WHtR                          | 0.272  | 0.096      | 0.304          | 2.828  | 0.005   |
| <b>ABI</b>                    |        |            |                |        |         |
| Age                           | -0.001 | 0.000      | -0.125         | -2.840 | 0.005   |
| Gender                        | -0.033 | 0.012      | -0.122         | -2.815 | 0.005   |
| Years of hypertension (years) | -0.026 | 0.012      | -0.091         | -2.066 | 0.039   |

<sup>a</sup>Adjusted for Medication treatment.

doi:10.1371/journal.pone.0170959.t004



**Table 5. Association between waist circumference and BP control among Kazakh-Chinese hypertension patients (N = 516) residing in the pasture area of Xinjiang, China, 2014.**

| Risk factors           | Reference     | B <sup>a</sup> | Odds ratio | 95% Confidence interval | P value |
|------------------------|---------------|----------------|------------|-------------------------|---------|
| 94 ≤ WC < 102cm (men)  | <94cm (men)   | 0.025          | 1.025      | 0.561~1.874             | 0.935   |
| 80 ≤ WC < 88cm (women) | <80cm (women) |                |            |                         |         |
| WC ≥ 102cm (men)       | <94cm (men)   | 0.658          | 1.932      | 1.149~3.249             | 0.013   |
| WC ≥ 88cm (women)      | <80cm (women) |                |            |                         |         |

<sup>a</sup> Standardized coefficients.

Adjusted for Age, Gender, Years of hypertension, and Medication treatment.

doi:10.1371/journal.pone.0170959.t005

consistent while predicting the incidence of hypertension in Mauritian Indian women. On the other hand, Bektas et al. [30] observed that WC had stronger positive association with elevated BP. As a part of the hypertension control program in the Kazakh pastureland, the current study aimed to identify the anthropometric measures corroborating strongly with achieving hypertension control among Kazakh-Chinese residents of Xinjiang, China. Other objectives included identification of the important predictors for hypertension control (through achieving target levels of BP, SBP, DBP, PPI and ABI) among hypertensive patients in Kazakh community.

Growing bodies of evidence suggested elevated SBP to be a strong and direct predictor for mortality among hypertensive patients aged >50 years [31, 32]. In this study the highest SBP (162.38 ± 24.12 mmHg) was observed among patients aged >70 years. While further analysis through multiple stepwise regression identified age and duration of hypertension as strong correlates of SBP, the anthropometric measures failed to satisfy the model inclusion criteria.

High DBP had been found previously to be associated with higher likelihood of organ damage among patients aged <50 years [31, 33]. In this study, DBP was highest (90.50 ± 17.26 mmHg) among patients aged 50–60 years. Multiple stepwise regression analysis identified a significant association between BMI and DBP. Based on the findings, it appeared that screening and monitoring of BMI should be made an integral part of the hypertension control program in this pastureland especially targeting the Kazakh-Chinese patients having uncontrolled DBP.

It was also revealed that SBP, DBP and PPI were higher among women than men, while the case was reverse for ABI. Thus, contradicting with some prior observations [34], this study indicated relatively poorer control of BP among Kazakh women compared to their male counterparts. The observation was supported by the findings that the prevalence of obesity and abdominal obesity were also significantly high among women than men (32.9% vs. 25.5% and 79.8% vs. 41.0%) in this study. Potential explanations included the gender differences in life-style of the Kazakhs, especially among those who adhered to traditional nomadic life, residing in remote mountains. These men were very active, involved in physically demanding, outdoor jobs like taking care of livestock in hilly terrains, whereas women remained less physically active, busy in household works and child-care.

Determination of PPI, through BP measurement, was found to be rapid. Previous research also established it as a better indicator than PP for the assessment of cardiovascular outcomes [5]. To the best of our knowledge, this was the first effort to deduce correlation between PPI and the anthropometric indicators. Bivariate analysis revealed that females, those aged >60 years, having full-time occupation, suffering from hypertension for >5 years, and having 25 ≤ BMI < 30 were more likely to have higher PPI. Multiple stepwise regression analysis indicated that age and WHtR were positively and WC was negatively associated with PPI. Earlier studies did also indicate WHtR as a better correlate of hypertension compared to BMI and

WC among adolescents[35], children[36] and large (>3000,000) population in general[37]. Explanations included the ability of WHtR to rule out the influence of height resulting into better correlation with cardio-metabolic risk among majority irrespective of their heights. Hence it appeared that for achieving better control of hypertension and thus higher life expectancy in this Kazakh-Chinese community, public health professionals should emphasize on WHtR instead of WC among patients and warrant them to “keep waist circumference below half of the height”.

ABI measurement had widely been recommended for PAD screening[38]. Abnormal ABI (<0.9 or >1.3) was found to increase the risk of cardiovascular death among hypertensive patients by 3–5%[39]. In the current study, 2.9% hypertensive patients had ABI<0.9 while for 11.2% it was  $\geq$ 1.3. Alike elsewhere[40], females and those suffering longer ( $\geq$ 5 years) from hypertension had higher likelihood of having abnormal ABI.

After adjustment for age, gender, duration of hypertension and medication, hypertensive patients having abdominal obesity were 1.9 times likely to fail to achieve the target BP through the existing control program. Thus it appeared that prior screening and monitoring of WC might help in identification and then targeted intensification of intervention among patients having abdominal obesity, to improve their chances of achieving BP control.

The study had some important limitations. First, hypertensive patients of Kazakh ethnicity were recruited for this study through a community-based sampling which could have missed some patients not residing locally for study (younger ones) or jobs elsewhere. Thus, further efforts should be made using multiple strategies to make the sample more comprehensive in future. Non-inclusion of any healthy control group could also be viewed as another limitation of this study that involved only the hypertensive patients. Besides, in order to ensure the reliability, 34 subjects with incomplete data were excluded, which might have limited the generalizability of the findings of this study to some extent in addition to the age-related issue. Alike any observational study with cross-sectional design, the observed associations should not be interpreted as causal and any effort to extrapolate the results beyond the study sample to be made with caution. Owing to the very small number of diagnosed cases of non-communicable diseases in the study sample, determination of the association between anthropometric measures and BP control among those specific cases was not possible. Last but not the least, our study did not collect detailed information on high blood pressure treatment.

## Conclusions

Observed values for the hypertension related indicators including SBP, DBP, PP and PPI as well as anthropometric measures like BMI, WC, WHR and WHtR were far beyond the normal ranges among hypertensive patients of Kazakh-Chinese ethnicity in Xinjiang pastureland. Subjects having higher anthropometric measures like BMI, WC, WHR, and WHtR, were more likely to end up with higher achieved levels of SBP, DBP, PP and PPI through efforts for hypertension control. After adjustment for the potential socio-demographic confounders, BMI and WHtR appeared to be independent risk factor for having higher DBP and PPI levels respectively. WC was also found to be associated positively with odds of having uncontrolled hypertension among Kazakh-Chinese residents of the study area. Thus for better effectiveness, hypertension control programs in this part of China, need to include anthropometric screening and targeted intervention for the identified population susceptible for poor BP control.

## Supporting Information

**S1 Dataset.**  
(SAV)

## Acknowledgments

The authors thank for all the participants of this study for their contribution to the current reported study.

## Author Contributions

**Conceptualization:** QZ JZ.

**Data curation:** QZ FH.

**Formal analysis:** QZ FH YG TM.

**Funding acquisition:** QZ.

**Investigation:** QZ YG FH LF YL AW LZ.

**Methodology:** QZ FH.

**Project administration:** QZ JZ.

**Resources:** QZ WT ST.

**Software:** QZ FH.

**Supervision:** QZ JZ.

**Validation:** QZ FH YL.

**Visualization:** QZ YG.

**Writing – original draft:** QZ FH TM WT.

**Writing – review & editing:** QZ TM FH WT ST.

## References

1. Perkovic V, Huxley R, Wu YF, Prabhakaran D, MacMahon S. The burden of blood pressure-related disease—a neglected priority for global health. *Hypertension* 2007; 50(6): 991–997. doi: [10.1161/HYPERTENSIONAHA.107.095497](https://doi.org/10.1161/HYPERTENSIONAHA.107.095497) PMID: [17954719](https://pubmed.ncbi.nlm.nih.gov/17954719/)
2. Lim SS, Vos T, Flaxman AD, Danaei G, Shibuya K, Adair-Rohani H, et al. A comparative risk assessment of burden of disease and injury attributable to 67 risk factors and risk factor clusters in 21 regions, 1990–2010: A systematic analysis for the Global Burden of Disease Study 2010. *Lancet* 2012; 380(9859): 2224–60. doi: [10.1016/S0140-6736\(12\)61766-8](https://doi.org/10.1016/S0140-6736(12)61766-8) PMID: [23245609](https://pubmed.ncbi.nlm.nih.gov/23245609/)
3. Li YC, Wang LM, Zhou MG. Hypertension in China: Time Trend on its Prevalence, Awareness, Treatment, and Control, Between 2004 and 2010. *Journal of the American College of Cardiology* 2014; 64S(16): C96.
4. Liu F, Ma Y. The prevalence of hypertension, obesity and diabetes in Xinjiang, China. *Journal of the American College of Cardiology* 2014; 64S(16): C96.
5. Peng-Lin Y, Yue-Chun L. Pulse pressure index (pulse pressure/systolic pressure) may be better than pulse pressure for assessment of cardiovascular outcomes. *Medical Hypotheses* 2009; 72(6): 729–31. doi: [10.1016/j.mehy.2008.12.041](https://doi.org/10.1016/j.mehy.2008.12.041) PMID: [19231092](https://pubmed.ncbi.nlm.nih.gov/19231092/)
6. Wang X, Ding Y. The impact of different periods of dynamic pulse pressure index on the target organ damage in hypertensive patients. *Journal of the American College of Cardiology* 2015; 66S(16): C205.
7. Lee W, Hsu P, Chu C, Chen S, Su H, Lin T, et al. Associations of pulse pressure index with left ventricular filling pressure and diastolic dysfunction in patients with chronic kidney disease. *American Journal of Hypertension* 2014; 27(3): 454–9. doi: [10.1093/ajh/hpt228](https://doi.org/10.1093/ajh/hpt228) PMID: [24326205](https://pubmed.ncbi.nlm.nih.gov/24326205/)
8. Cai A, Mo Y, Zhang Y, Li J, Chen J, Zhou Y, et al. Relationship of pulse pressure index and carotid intima-media thickness in hypertensive adults. *Clinical and Experimental Hypertension* 2015; 37(4): 267–70. doi: [10.3109/10641963.2014.954713](https://doi.org/10.3109/10641963.2014.954713) PMID: [25375964](https://pubmed.ncbi.nlm.nih.gov/25375964/)

9. Lamina C, Meisinger C, Heid IM, Loewel H, Rantner B, Koenig W, et al. Association of ankle-brachial index and plaques in the carotid and femoral arteries with cardiovascular events and total mortality in a population-based study with 13 years of follow-up. *European Heart Journal* 2006; 27(21): 2580–7. doi: [10.1093/eurheartj/ehl228](https://doi.org/10.1093/eurheartj/ehl228) PMID: [16952925](https://pubmed.ncbi.nlm.nih.gov/16952925/)
10. Mancia G, De Backer G, Dominiczak A, Cifkova R, Fagard R, Germano G, et al. 2007 Guidelines for the management of arterial hypertension—the task force for the management of arterial hypertension of the European society of hypertension (ESH) and of the European society of cardiology (ESC). *European Heart Journal* 2007; 28(12): 1462–536. doi: [10.1093/eurheartj/ehm236](https://doi.org/10.1093/eurheartj/ehm236) PMID: [17562668](https://pubmed.ncbi.nlm.nih.gov/17562668/)
11. Pasqualini L, Schillaci G, Pirro M, Vaudo G, Leli C, Colella R, et al. Prognostic value of low and high ankle-brachial index in hospitalized medical patients. *European Journal of Internal Medicine* 2012; 23(3): 240–4. doi: [10.1016/j.ejim.2011.09.004](https://doi.org/10.1016/j.ejim.2011.09.004) PMID: [22385881](https://pubmed.ncbi.nlm.nih.gov/22385881/)
12. de Moraes SA, Checchio MV, de Freitas ICM. The independent effect of central obesity on hypertension in adults living in Ribeirao Preto, SP, 2007. EPIDCV Project. *Revista brasileira de epidemiologia = Brazilian journal of epidemiology* 2015; 18(1): 157–73. doi: [10.1590/1980-5497201500010013](https://doi.org/10.1590/1980-5497201500010013) PMID: [25651019](https://pubmed.ncbi.nlm.nih.gov/25651019/)
13. Park SH, Park JH, Song PS, Kim DK, Kim KH, Seol SH, et al. Sarcopenic obesity as an independent risk factor of hypertension. *Journal of the American Society of Hypertension* 2013; 7(6): 420–5. doi: [10.1016/j.jash.2013.06.002](https://doi.org/10.1016/j.jash.2013.06.002) PMID: [23910010](https://pubmed.ncbi.nlm.nih.gov/23910010/)
14. Redon J, Cea-Calvo L, Moreno B, Monereo S, Gil-Guillen V, Lozano JV, et al. Independent impact of obesity and fat distribution in hypertension prevalence and control in the elderly. *Journal of Hypertension* 2008; 26(9): 1757–4. doi: [10.1097/HJH.0b013e3283077f03](https://doi.org/10.1097/HJH.0b013e3283077f03) PMID: [18698209](https://pubmed.ncbi.nlm.nih.gov/18698209/)
15. Mi Y, Zhang B, Wang H, Yan J, Han W, Zhao J, et al. Prevalence and secular trends in obesity among chinese adults, 1991–2011. *American Journal of Preventive Medicine* 2015; 49(5): 661–9. doi: [10.1016/j.amepre.2015.05.005](https://doi.org/10.1016/j.amepre.2015.05.005) PMID: [26275960](https://pubmed.ncbi.nlm.nih.gov/26275960/)
16. Liu C, Ma X, Ma Y, Liu F, Yang Y, Huang D, et al. [Prevalence on overweight and obesity in Han, Uyгур and Hazakh in adults from Xinjiang]. *Zhonghua liu xing bing xue za zhi = Zhonghua liuxingbingxue zazhi* 2010; 31(10): 1139–43. PMID: [21162817](https://pubmed.ncbi.nlm.nih.gov/21162817/)
17. Mello RB, Moreira LB, Gus M, Wiehe M, Fuchs FD, Fuchs SC. Central obesity is a risk factor for hypertension independent of body mass index in elderly individuals: Results of a Population-Based study. *Circulation* 2011; 124S(21).
18. Rodea-Montero ER, Evia-Viscarra ML, Apolinar-Jimenez E. Waist-to-Height ratio is a better anthropometric index than waist circumference and BMI in predicting metabolic syndrome among obese mexican adolescents. *International Journal of Endocrinology* 2014; 2014: 19540.
19. 2013 ESH/ESC Guidelines for the Management of Arterial Hypertension. *Blood Pressure* 2013; 22(4): 193–78. doi: [10.3109/08037051.2013.812549](https://doi.org/10.3109/08037051.2013.812549) PMID: [23777479](https://pubmed.ncbi.nlm.nih.gov/23777479/)
20. Liu F, Ma YT, Yang YN, Xie X, Li XM, Huang Y, et al. Current status of primary hypertension in Xinjiang: An epidemiological study of Han, Uyгур and Hazakh populations. *Zhonghua yi xue za zhi* 2010; 90(46): 3259–63. PMID: [21223782](https://pubmed.ncbi.nlm.nih.gov/21223782/)
21. Ni P, Chen JL, Liu N. The sample size estimation hi quantitative nursing research. *CHINESE JOURNAL OF NURSING* 2010; 45(4): 378–80.
22. Longo D, Bertolo O, Toffanin G, Frezza P, Palatini P. Validation of the a&D UA-631 (UA-779 Life Source) device for self-measurement of blood pressure and relationship between its performance and large artery compliance. *Blood Pressure Monitoring* 2002; 7(4): 243–8. PMID: [12198341](https://pubmed.ncbi.nlm.nih.gov/12198341/)
23. Armstrong C. JNC 8 guidelines for the management of hypertension in adults. *American Family Physician* 2014; 90(7): 503–4. PMID: [25369633](https://pubmed.ncbi.nlm.nih.gov/25369633/)
24. Mancia G, Fagard R, Narkiewicz K, Redon J, Zanchetti A, Bohm M, et al. 2013 Practice guidelines for the management of arterial hypertension of the European Society of Hypertension (ESH) and the European Society of Cardiology (ESC). *Journal of Hypertension* 2013; 31(10): 1925–38. doi: [10.1097/HJH.0b013e328364ca4c](https://doi.org/10.1097/HJH.0b013e328364ca4c) PMID: [24107724](https://pubmed.ncbi.nlm.nih.gov/24107724/)
25. Alberti K, Eckel RH, Grundy SM, Zimmet PZ, Cleeman JI, Donato KA, et al. Harmonizing the metabolic syndrome a joint interim statement of the international diabetes federation task force on epidemiology and prevention; National heart, lung, and blood institute; American heart association; World heart federation; International atherosclerosis society; And international association for the study of obesity. *Circulation* 2009; 120(16): 1640–5. doi: [10.1161/CIRCULATIONAHA.109.192644](https://doi.org/10.1161/CIRCULATIONAHA.109.192644) PMID: [19805654](https://pubmed.ncbi.nlm.nih.gov/19805654/)
26. Aekplakorn W, Kosulwat V, Suriyawongpaisal P. Obesity indices and cardiovascular risk factors in Thai adults. *International Journal of Obesity* 2006; 30(12): 1782–90. doi: [10.1038/sj.ijo.0803346](https://doi.org/10.1038/sj.ijo.0803346) PMID: [16619055](https://pubmed.ncbi.nlm.nih.gov/16619055/)
27. Alberti K, Zimmet PZ. Definition, diagnosis and classification of diabetes mellitus and its complications part 1: Diagnosis and classification of diabetes mellitus—Provisional report of a WHO consultation.

- Diabetic Medicine 1998; 15(7): 539–53. doi: [10.1002/\(SICI\)1096-9136\(199807\)15:7<539::AID-DIA668>3.0.CO;2-S](https://doi.org/10.1002/(SICI)1096-9136(199807)15:7<539::AID-DIA668>3.0.CO;2-S) PMID: [9686693](https://pubmed.ncbi.nlm.nih.gov/9686693/)
28. Jayawardana R, Ranasinghe P, Sheriff M, Matthews DR, Katulanda P. Waist to height ratio: A better anthropometric marker of diabetes and cardio-metabolic risks in South Asian adults. *Diabetes Research and Clinical Practice* 2013; 99(3): 292–9. doi: [10.1016/j.diabres.2012.12.013](https://doi.org/10.1016/j.diabres.2012.12.013) PMID: [23298662](https://pubmed.ncbi.nlm.nih.gov/23298662/)
  29. Nyamdorj R, Qiao Q, Soderberg S, Pitkaniemi J, Zimmet P, Shaw J, et al. Comparison of body mass index with waist circumference, waist-to-hip ratio, and waist-to-stature ratio as a predictor of hypertension incidence in Mauritius. *Journal of Hypertension* 2008; 26(5): 866–70. doi: [10.1097/HJH.0b013e3282f624b7](https://doi.org/10.1097/HJH.0b013e3282f624b7) PMID: [18398327](https://pubmed.ncbi.nlm.nih.gov/18398327/)
  30. Yalcin BM, Sahin EM, Yalcin E. Which anthropometric measurements is most closely related to elevated blood pressure? *Family Practice* 2005; 22(5): 541–7. doi: [10.1093/fampra/cmi043](https://doi.org/10.1093/fampra/cmi043) PMID: [15964872](https://pubmed.ncbi.nlm.nih.gov/15964872/)
  31. Taylor BC, Wilt TJ, Welch HG. Impact of diastolic and systolic blood pressure on mortality: Implications for the definition of "normal". *Journal of General Internal Medicine* 2011; 26(7): 685–90. doi: [10.1007/s11606-011-1660-6](https://doi.org/10.1007/s11606-011-1660-6) PMID: [21404131](https://pubmed.ncbi.nlm.nih.gov/21404131/)
  32. Lewington S, Clarke R, Qizilbash N, Peto R, Collins R. Age-specific relevance of usual blood pressure to vascular mortality: A meta-analysis of individual data for one million adults in 61 prospective studies. *Lancet* 2002; 360(9349): 1903–13. PMID: [12493255](https://pubmed.ncbi.nlm.nih.gov/12493255/)
  33. Suarez JJ, Isakova T, Anderson C, Boulware LE, Wolf M, Scialla JJ. Food access, chronic kidney disease, and hypertension in the US. *American Journal of Preventive Medicine* 2015; 49(6): 912–20. doi: [10.1016/j.amepre.2015.07.017](https://doi.org/10.1016/j.amepre.2015.07.017) PMID: [26590940](https://pubmed.ncbi.nlm.nih.gov/26590940/)
  34. Alsuwaida A, Alghonaim M. Gender disparities in the awareness and control of hypertension. *Clinical and Experimental Hypertension* 2011; 33(5): 354–7. doi: [10.3109/10641963.2010.531857](https://doi.org/10.3109/10641963.2010.531857) PMID: [21529315](https://pubmed.ncbi.nlm.nih.gov/21529315/)
  35. Rivera-Soto WT, Rodriguez-Figueroa L. Is Waist-to-Height ratio a better obesity Risk-Factor indicator for puerto rican children than is BMI or waist circumference? *Puerto Rico Health Sciences Journal* 2016; 35(1): 20–5. PMID: [26932280](https://pubmed.ncbi.nlm.nih.gov/26932280/)
  36. Maximova K, Chiolero A, O'Loughlin J, Tremblay A, Lambert M, Paradis G. Ability of different adiposity indicators to identify children with elevated blood pressure. *Journal of Hypertension* 2011; 29(11): 2075–83. doi: [10.1097/HJH.0b013e32834be614](https://doi.org/10.1097/HJH.0b013e32834be614) PMID: [21970936](https://pubmed.ncbi.nlm.nih.gov/21970936/)
  37. Ashwell M, Gunn P, Gibson S. Waist-to-height ratio is a better screening tool than waist circumference and BMI for adult cardiometabolic risk factors: Systematic review and meta-analysis. *Obesity Reviews* 2012; 13(3): 275–86. doi: [10.1111/j.1467-789X.2011.00952.x](https://doi.org/10.1111/j.1467-789X.2011.00952.x) PMID: [22106927](https://pubmed.ncbi.nlm.nih.gov/22106927/)
  38. Hirsch AT, Haskal ZJ, Hertzner NR, Bakal CW, Creager MA, Halperin JL, et al. ACC/AHA 2005 practice guidelines for the management of patients with peripheral arterial disease (lower extremity, renal, mesenteric, and abdominal aortic)—a collaborative report from the American Association for Vascular Surgery/Society for Vascular Surgery, \* Society for Cardiovascular Angiography and Interventions, Society for Vascular Medicine and Biology, Society of Interventional Radiology, and the ACC/AHA Task Force on Practice Guidelines (Writing Committee to Develop Guidelines for the Management of Patients with Peripheral Arterial Disease). *Circulation* 2006; 113(11): E463–E654. doi: [10.1161/CIRCULATIONAHA.106.174526](https://doi.org/10.1161/CIRCULATIONAHA.106.174526) PMID: [16549646](https://pubmed.ncbi.nlm.nih.gov/16549646/)
  39. Resnick HE, Lindsay RS, McDermott MM, Devereux RB, Jones KL, Fabsitz RR, et al. Relationship of high and low ankle brachial index to all-cause and cardiovascular disease mortality—the Strong Heart Study. *Circulation* 2004; 109(6): 733–9. doi: [10.1161/01.CIR.0000112642.63927.54](https://doi.org/10.1161/01.CIR.0000112642.63927.54) PMID: [14970108](https://pubmed.ncbi.nlm.nih.gov/14970108/)
  40. Criqui MH, McClelland RL, McDermott MM, Allison MA, Blumenthal RS, Aboyans V, et al. The Ankle-Brachial index and incident cardiovascular events in the MESA (Multi-Ethnic study of atherosclerosis). *Journal of the American College of Cardiology* 2010; 56(18): 1506–12. doi: [10.1016/j.jacc.2010.04.060](https://doi.org/10.1016/j.jacc.2010.04.060) PMID: [20951328](https://pubmed.ncbi.nlm.nih.gov/20951328/)
